# Supplementary material
Source: Elsevier journal article supplement (https://lshtm-eprints-repo-prod.lshtm-eprints.cdl.cosector.com/2261/1/mmc1.pdf)
Supplement: mmc1 [file mmc1.pdf]

# THE LANCET

## **Supplementary webappendix**

This webappendix formed part of the original submission and has been peer reviewed. We post it as supplied by the authors.

Supplement to: DART Trial Team. Routine versus clinically driven laboratory monitoring of HIV antiretroviral therapy in Africa (DART): a randomised non-inferiority trial. *Lancet* 2009; published online Dec 9. DOI:10.1016/S0140-6736(09)62067-5.

**WebTable 1 Routine laboratory tests for toxicity**

|                                                     | Haematology panel (haemoglobin, white cell count, neutrophils, platelets) |        |          |        | Biochemistry panel (urea, bilirubin, creatinine, ALT/AST) |         |        |        |
|-----------------------------------------------------|---------------------------------------------------------------------------|--------|----------|--------|-----------------------------------------------------------|---------|--------|--------|
|                                                     | CDM                                                                       |        | LCM      |        | CDM                                                       |         | LCM    |        |
|                                                     |                                                                           |        |          |        |                                                           |         |        |        |
| Total number of tests performed                     | 138244                                                                    |        | 142187   |        | 159026                                                    |         | 161206 |        |
| N (%) at extra patient initiated visits             | 8955                                                                      | (6.5%) | 10501    | (7.4%) | 7183                                                      | (4.5%)  | 7028   | (4.4%) |
| N (%) released in CDM                               | 4973                                                                      | (3.6%) |          |        | 3887                                                      | (2.4%)  |        |        |
| - requested by clinician                            | 4019                                                                      | (2.9%) | -        |        | 3812                                                      | (2.4%)  | -      |        |
| - returned per protocol*                            | 954**                                                                     | (0.7%) |          |        | 75                                                        | (0.05%) |        |        |
| Total number of participants                        | 1660                                                                      |        | 1656     |        | 1660                                                      |         | 1656   |        |
| One or more extra patient initiated visit with test | 812                                                                       | (49%)  | 965      | (58%)  | 639                                                       | (38%)   | 683    | (41%)  |
|                                                     |                                                                           |        | p<0.0001 |        |                                                           |         | p=0.11 |        |
| - # visits (median, IQR)                            | 2                                                                         | (1-4)  | 2        | (1-4)  | 2                                                         | (1-4)   | 2      | (1-3)  |
|                                                     |                                                                           |        | p=0.94   |        |                                                           |         | p=0.55 |        |

\* Grade 4 test result not already requested by clinician

\*\* mostly (n=743) Grade 4 neutrophils ( $<0.5 \times 10^9/l$ ) which were not acted on. Also 115 grade 4 haemoglobins in 88 patients (28 died). 60/115 (52%) occurred before 24 weeks, and 23/115 (20%) were immediately preceded by a haemoglobin result requested by the CDM clinician.

Note: CDM clinicians could request one or more of the individual tests in a panel at extra visits.

**WebTable 2 Serious Adverse Events**

| Category and details of event                                                         | CDM       | LCM        | Total      |
|---------------------------------------------------------------------------------------|-----------|------------|------------|
| <b>Total</b>                                                                          | <b>35</b> | <b>305</b> | <b>650</b> |
| <b>Biochemical: Total</b>                                                             | <b>3</b>  |            | <b>3</b>   |
| Hyperglycaemia                                                                        | 1         |            | 1          |
| Hypokalaemia                                                                          | 1         |            | 1          |
| Raised liver enzymes                                                                  | 1         |            | 1          |
| <b>CNS: Total</b>                                                                     | <b>19</b> | <b>10</b>  | <b>29</b>  |
| Cranial nerve lesion+Jaundice+Epilepsy, fits, convulsions                             | 1         |            | 1          |
| Dizziness                                                                             | 1         |            | 1          |
| Epilepsy, fits, convulsions                                                           | 4         | 5          | 9          |
| Epilepsy, fits, convulsions+Acute altered conscious level                             | 1         |            | 1          |
| Epilepsy, fits, convulsions+Acute focal neurological event without fever              | 1         |            | 1          |
| Headache+Acute altered conscious level                                                | 1         |            | 1          |
| Hemiparesis                                                                           |           | 1          | 1          |
| Other CNS disease                                                                     |           | 1          | 1          |
| Parathesia, transient numbness, tingling+Diabetes - Type I+Metabolic disorder - other |           | 1          | 1          |
| Peripheral neuropathy - sensory & motor                                               | 2         |            | 2          |
| Peripheral neuropathy - sensory only                                                  | 2         |            | 2          |
| Stroke, cerebrovascular accident                                                      | 5         | 2          | 7          |
| Stroke, cerebrovascular accident+Raised liver enzymes                                 | 1         |            | 1          |
| <b>Cardiovascular: Total</b>                                                          | <b>30</b> | <b>22</b>  | <b>52</b>  |
| Cardiomyopathy                                                                        | 5         | 7          | 12         |
| Cardiomyopathy+Congestive cardiac failure                                             | 1         |            | 1          |
| Chest pain                                                                            | 1         |            | 1          |
| Congestive cardiac failure                                                            | 9         | 3          | 12         |
| Deep vein thrombosis                                                                  | 10        | 9          | 19         |
| Deep vein thrombosis+Gangrene                                                         |           | 1          | 1          |
| Hypotension/shock/toxic shock                                                         | 1         |            | 1          |
| Other cardiovascular                                                                  | 1         |            | 1          |
| Pericarditis not TB or bacterial or no cause identified+Congestive cardiac failure    |           | 1          | 1          |
| Pulmonary embolism+Deep vein thrombosis                                               | 1         | 1          | 2          |
| Pulmonary hypertension+Cardiomyopathy                                                 | 1         |            | 1          |
| <b>Congenital abnormality: Total</b>                                                  | <b>4</b>  | <b>4</b>   | <b>8</b>   |
| Club foot                                                                             | 1         | 3          | 4          |
| Hydrocephalus, congenital intersusception bowel                                       | 1         |            | 1          |
| Other cardiovascular                                                                  |           | 1          | 1          |
| Prematurity                                                                           | 2         |            | 2          |
| <b>Endocrine: Total</b>                                                               | <b>7</b>  | <b>5</b>   | <b>12</b>  |
| Diabetes - Type I                                                                     |           | 3          | 3          |
| Diabetes - Type II                                                                    | 7         | 1          | 8          |
| Hypothyroidism                                                                        |           | 1          | 1          |
| <b>Eye: Total</b>                                                                     | <b>2</b>  | <b>1</b>   | <b>3</b>   |
| Conjunctival squamous cell carcinoma                                                  | 2         |            | 2          |
| Glaucoma                                                                              |           | 1          | 1          |
| <b>Gastrointestinal: Total</b>                                                        | <b>17</b> | <b>16</b>  | <b>33</b>  |
| Abdominal or epigastric pain                                                          |           | 4          | 4          |
| Acute diarrhoea no pathogen, idiopathic AIDS enteropathy                              | 1         |            | 1          |
| Anorexia, loss of appetite+Depression                                                 |           | 1          | 1          |
| Appendicitis                                                                          |           | 2          | 2          |
| Chronic diarrhoea not investigated+Vomiting                                           |           | 1          | 1          |
| Gall stones, cholecystitis, cholelithiasis+Hepatitis B                                | 1         |            | 1          |
| Haematemesis                                                                          | 1         |            | 2          |
| Haematemesis+Peptic/gastric/duodenal ulcer                                            |           | 1          | 1          |
| Indigestion, oesophageal reflux, gastritis, ulcerative oesophagitis                   | 2         | 1          | 3          |
| Intestinal obstruction                                                                | 2         |            | 2          |
| Pancreatitis                                                                          | 6         | 2          | 8          |
| Paralytic ileus, ileitis                                                              | 1         | 1          | 2          |
| Peptic/gastric/duodenal ulcer                                                         | 2         | 2          | 4          |
| Vomiting                                                                              | 1         |            | 1          |
| <b>Genitourinary: Total</b>                                                           | <b>2</b>  | <b>1</b>   | <b>3</b>   |
| Orchitis                                                                              |           | 1          | 1          |
| Puerperal sepsis                                                                      | 1         |            | 1          |
| Urinary retention                                                                     | 1         |            | 1          |
| <b>Haematological: Total</b>                                                          | <b>95</b> | <b>78</b>  | <b>173</b> |
| Anaemia                                                                               | 66        | 59         | 125        |
| Anaemia+Congestive cardiac failure                                                    |           | 1          | 1          |
| Anaemia+Enlarged spleen, splenomegaly                                                 | 1         |            | 1          |
| Anaemia+Hypertension                                                                  | 1         |            | 1          |
| Anaemia+Leucopenia                                                                    | 1         |            | 1          |
| Anaemia+Neutropenia                                                                   | 2         |            | 2          |
| Anaemia+P falciparum malaria                                                          | 1         |            | 1          |
| Anaemia+Pancytopenia, bone marrow depression                                          | 1         |            | 1          |
| Anaemia+Renal failure - acute                                                         | 1         |            | 1          |
| Anaemia+Thrombocytopenia                                                              | 1         |            | 1          |

| Category and details of event                                            | CDM       | LCM       | Total     |
|--------------------------------------------------------------------------|-----------|-----------|-----------|
| Anaemia+Thrombocytopenia+Neutropenia                                     |           | 1         | 1         |
| Neutropenia                                                              | 8         | 11        | 19        |
| Neutropenia+Leucopenia                                                   | 1         |           | 1         |
| Neutropenia+Thrombocytopenia                                             | 1         |           | 1         |
| Nose bleed, epistaxis                                                    | 1         | 1         | 2         |
| P falciparum malaria+Anaemia                                             | 1         |           | 1         |
| Pancytopenia, bone marrow depression                                     | 8         | 4         | 12        |
| Pancytopenia, bone marrow depression+Acute diarrhoea no pathogen         |           | 1         | 1         |
| <b>Hepatic: Total</b>                                                    | <b>18</b> | <b>23</b> | <b>41</b> |
| Acute hepatitis                                                          | 5         | 5         | 10        |
| Acute hepatitis+Renal failure - acute                                    | 1         |           | 1         |
| Cirrhosis                                                                | 1         |           | 1         |
| Hepatic failure                                                          | 1         | 4         | 5         |
| Hepatic steatosis                                                        | 1         |           | 1         |
| Hepatic steatosis+Cardiomyopathy                                         | 1         |           | 1         |
| Hepatitis B                                                              |           | 1         | 1         |
| Hepatitis cause unknown                                                  | 1         | 1         | 2         |
| Hepatocellular carcinoma                                                 | 1         | 1         | 2         |
| Jaundice                                                                 |           | 1         | 1         |
| Jaundice+Raised liver enzymes                                            |           | 1         | 1         |
| Lactic acidosis                                                          | 6         | 7         | 13        |
| Lactic acidosis+Peripheral neuropathy - sensory & motor                  |           | 1         | 1         |
| Recurrent fever - no diagnosis+Acute hepatitis                           |           | 1         | 1         |
| <b>Lower respiratory tract: Total</b>                                    | <b>5</b>  | <b>2</b>  | <b>7</b>  |
| Broncho-oesophageal fistula                                              | 1         |           | 1         |
| Bronchospasm/Asthma                                                      | 1         |           | 1         |
| Pneumonia no organism identified, aspiration pneumonia                   | 1         | 1         | 2         |
| Pulmonary embolism                                                       | 2         | 1         | 3         |
| <b>Musculoskeletal: Total</b>                                            | <b>25</b> | <b>22</b> | <b>47</b> |
| Arthralgia, arthritis, pain in joints, arthropathies                     | 2         | 3         | 5         |
| Bone fracture                                                            | 20        | 16        | 36        |
| Bone fracture+Osteoporosis                                               | 1         |           | 1         |
| Disc prolapse, slipped disc                                              |           | 2         | 2         |
| Myalgia, pain in muscles                                                 | 1         |           | 1         |
| Myopathy, muscle wasting                                                 | 1         |           | 1         |
| Pyomyositis - infection                                                  |           | 1         | 1         |
| <b>Non HIV related deaths: Total</b>                                     | <b>3</b>  | <b>7</b>  | <b>10</b> |
| Alcohol related                                                          |           | 2         | 2         |
| Obstetric                                                                | 1         | 1         | 2         |
| Suicide                                                                  | 1         |           | 1         |
| Traumatic                                                                | 1         | 4         | 5         |
| <b>Other: Total</b>                                                      | <b>26</b> | <b>14</b> | <b>40</b> |
| Death, cause unknown                                                     | 15        | 10        | 25        |
| Hysterectomy                                                             | 1         |           | 1         |
| Non-fatal trauma                                                         | 10        | 4         | 14        |
| <b>Pregnancy associated: Total</b>                                       | <b>3</b>  | <b>5</b>  | <b>8</b>  |
| Ectopic pregnancy                                                        |           | 2         | 2         |
| Other gram positive sepsis+Spontaneous abortion (complete or incomplete) |           | 1         | 1         |
| Septic abortion                                                          | 1         |           | 1         |
| Spontaneous abortion (complete or incomplete)                            | 2         | 1         | 3         |
| Still birth                                                              |           | 1         | 1         |
| <b>Psychiatric: Total</b>                                                | <b>8</b>  | <b>5</b>  | <b>13</b> |
| Parasuicide (suicide attempt)                                            | 2         | 1         | 3         |
| Psychosis, mania                                                         | 6         | 4         | 10        |
| <b>Renal: Total</b>                                                      | <b>8</b>  | <b>12</b> | <b>20</b> |
| Glomerulonephritis                                                       |           | 1         | 1         |
| Haematuria                                                               |           | 1         | 1         |
| Renal failure - acute                                                    | 5         | 8         | 13        |
| Renal failure - acute+Pancytopenia, bone marrow depression               | 1         |           | 1         |
| Renal failure - chronic                                                  | 2         | 1         | 3         |
| Renal failure - chronic+Congestive cardiac failure                       |           | 1         | 1         |
| <b>Skin: Total</b>                                                       | <b>41</b> | <b>46</b> | <b>87</b> |
| Burns                                                                    | 1         | 1         | 2         |
| Hypersensitivity reaction                                                | 22        | 18        | 40        |
| Hypersensitivity reaction+Acute hepatitis                                |           | 1         | 1         |
| Itching, pruritis, excoriation, scratching                               |           | 1         | 1         |
| Rash, erythematous                                                       | 2         | 3         | 5         |
| Rash, maculopapular                                                      | 12        | 12        | 24        |
| Rash, urticaria                                                          |           | 4         | 4         |
| Snake bite                                                               | 1         |           | 1         |
| Stevens-Johnson Syndrome                                                 | 3         | 6         | 9         |
| <b>Specific Infections: Total</b>                                        | <b>22</b> | <b>9</b>  | <b>31</b> |
| Cholera                                                                  | 2         | 1         | 3         |
| Leprosy                                                                  | 1         |           | 1         |
| P falciparum malaria                                                     | 18        | 7         | 25        |
| Presumed septicaemia/bacteremia - not investigated                       | 1         | 1         | 2         |

| <b>Category and details of event</b> | <b>CDM</b> | <b>LCM</b> | <b>Total</b> |
|--------------------------------------|------------|------------|--------------|
| <b>Systemic: Total</b>               |            | <b>4</b>   | <b>4</b>     |
| Acute febrile episode - undiagnosed  |            | 3          | 3            |
| Malnutrition                         |            | 1          | 1            |
| <b>Tumours: Total</b>                | <b>7</b>   | <b>19</b>  | <b>26</b>    |
| Cervical carcinoma                   | 1          | 12         | 13           |
| Other Solid tumour                   | 6          | 7          | 13           |
